# Supplementary figures and images for: Complement and CD4+ T cells drive context-specific corneal sensory neuropathy
Source: eLife journal article supplement (doi:10.7554/elife.48378), 2019-08-15

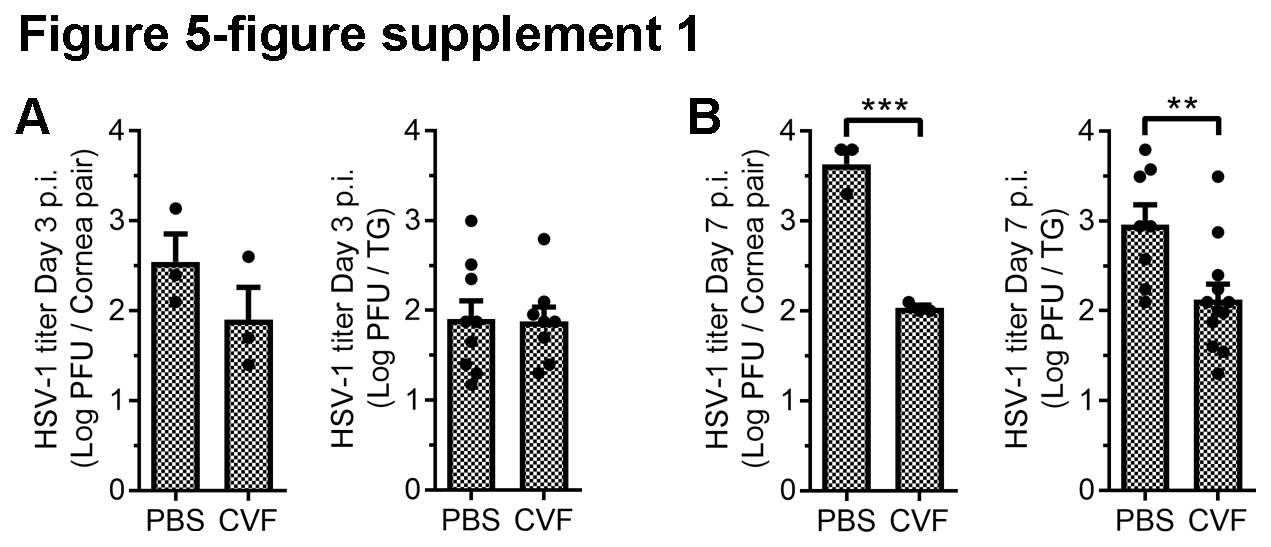

Supplement: supp [file elife-48378-supp-v1.zip › elife_poa_e48378_Figure_5_figure_supplement_1.tif]

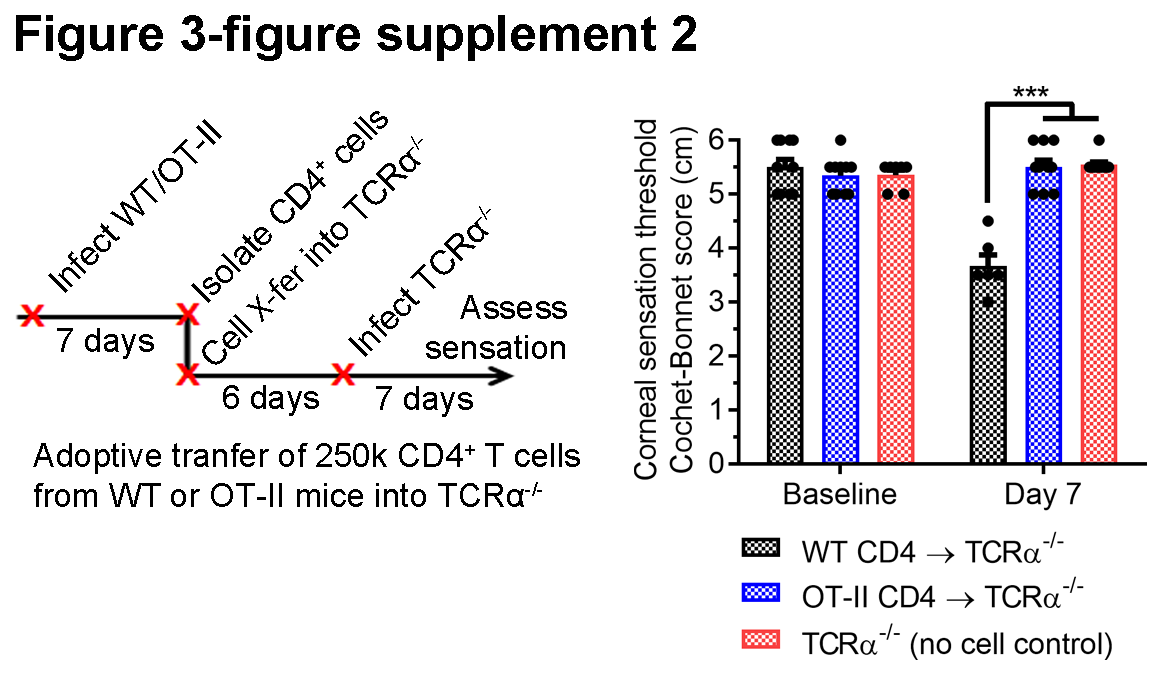

Supplement: supp [file elife-48378-supp-v1.zip › elife_poa_e48378_Figure_3_figure_supplement_2.tif]

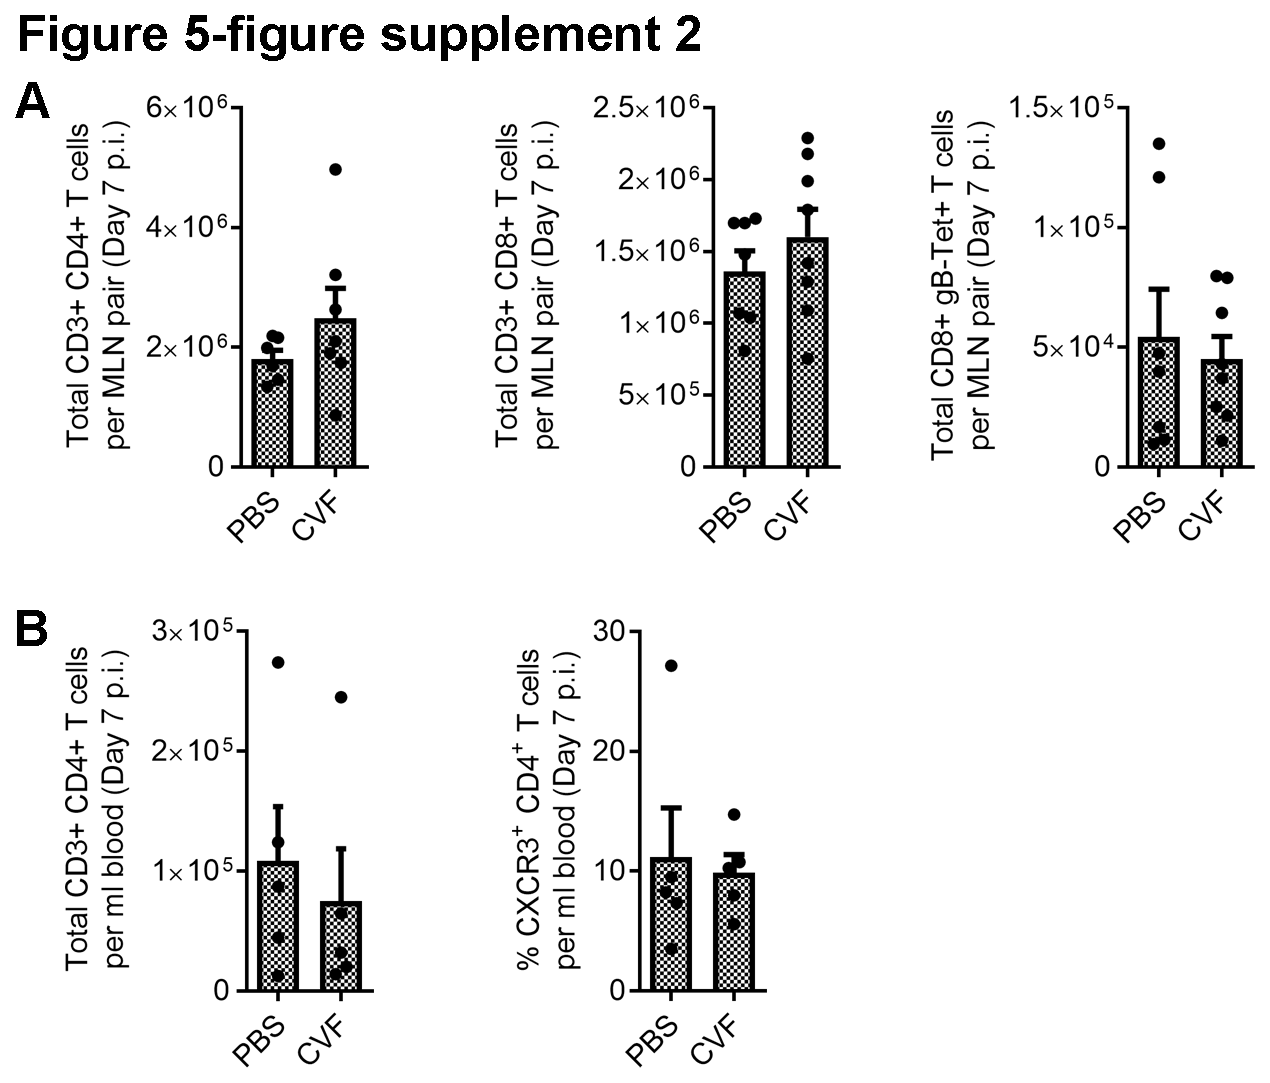

Supplement: supp [file elife-48378-supp-v1.zip › elife_poa_e48378_Figure_5_figure_supplement_2.tif]

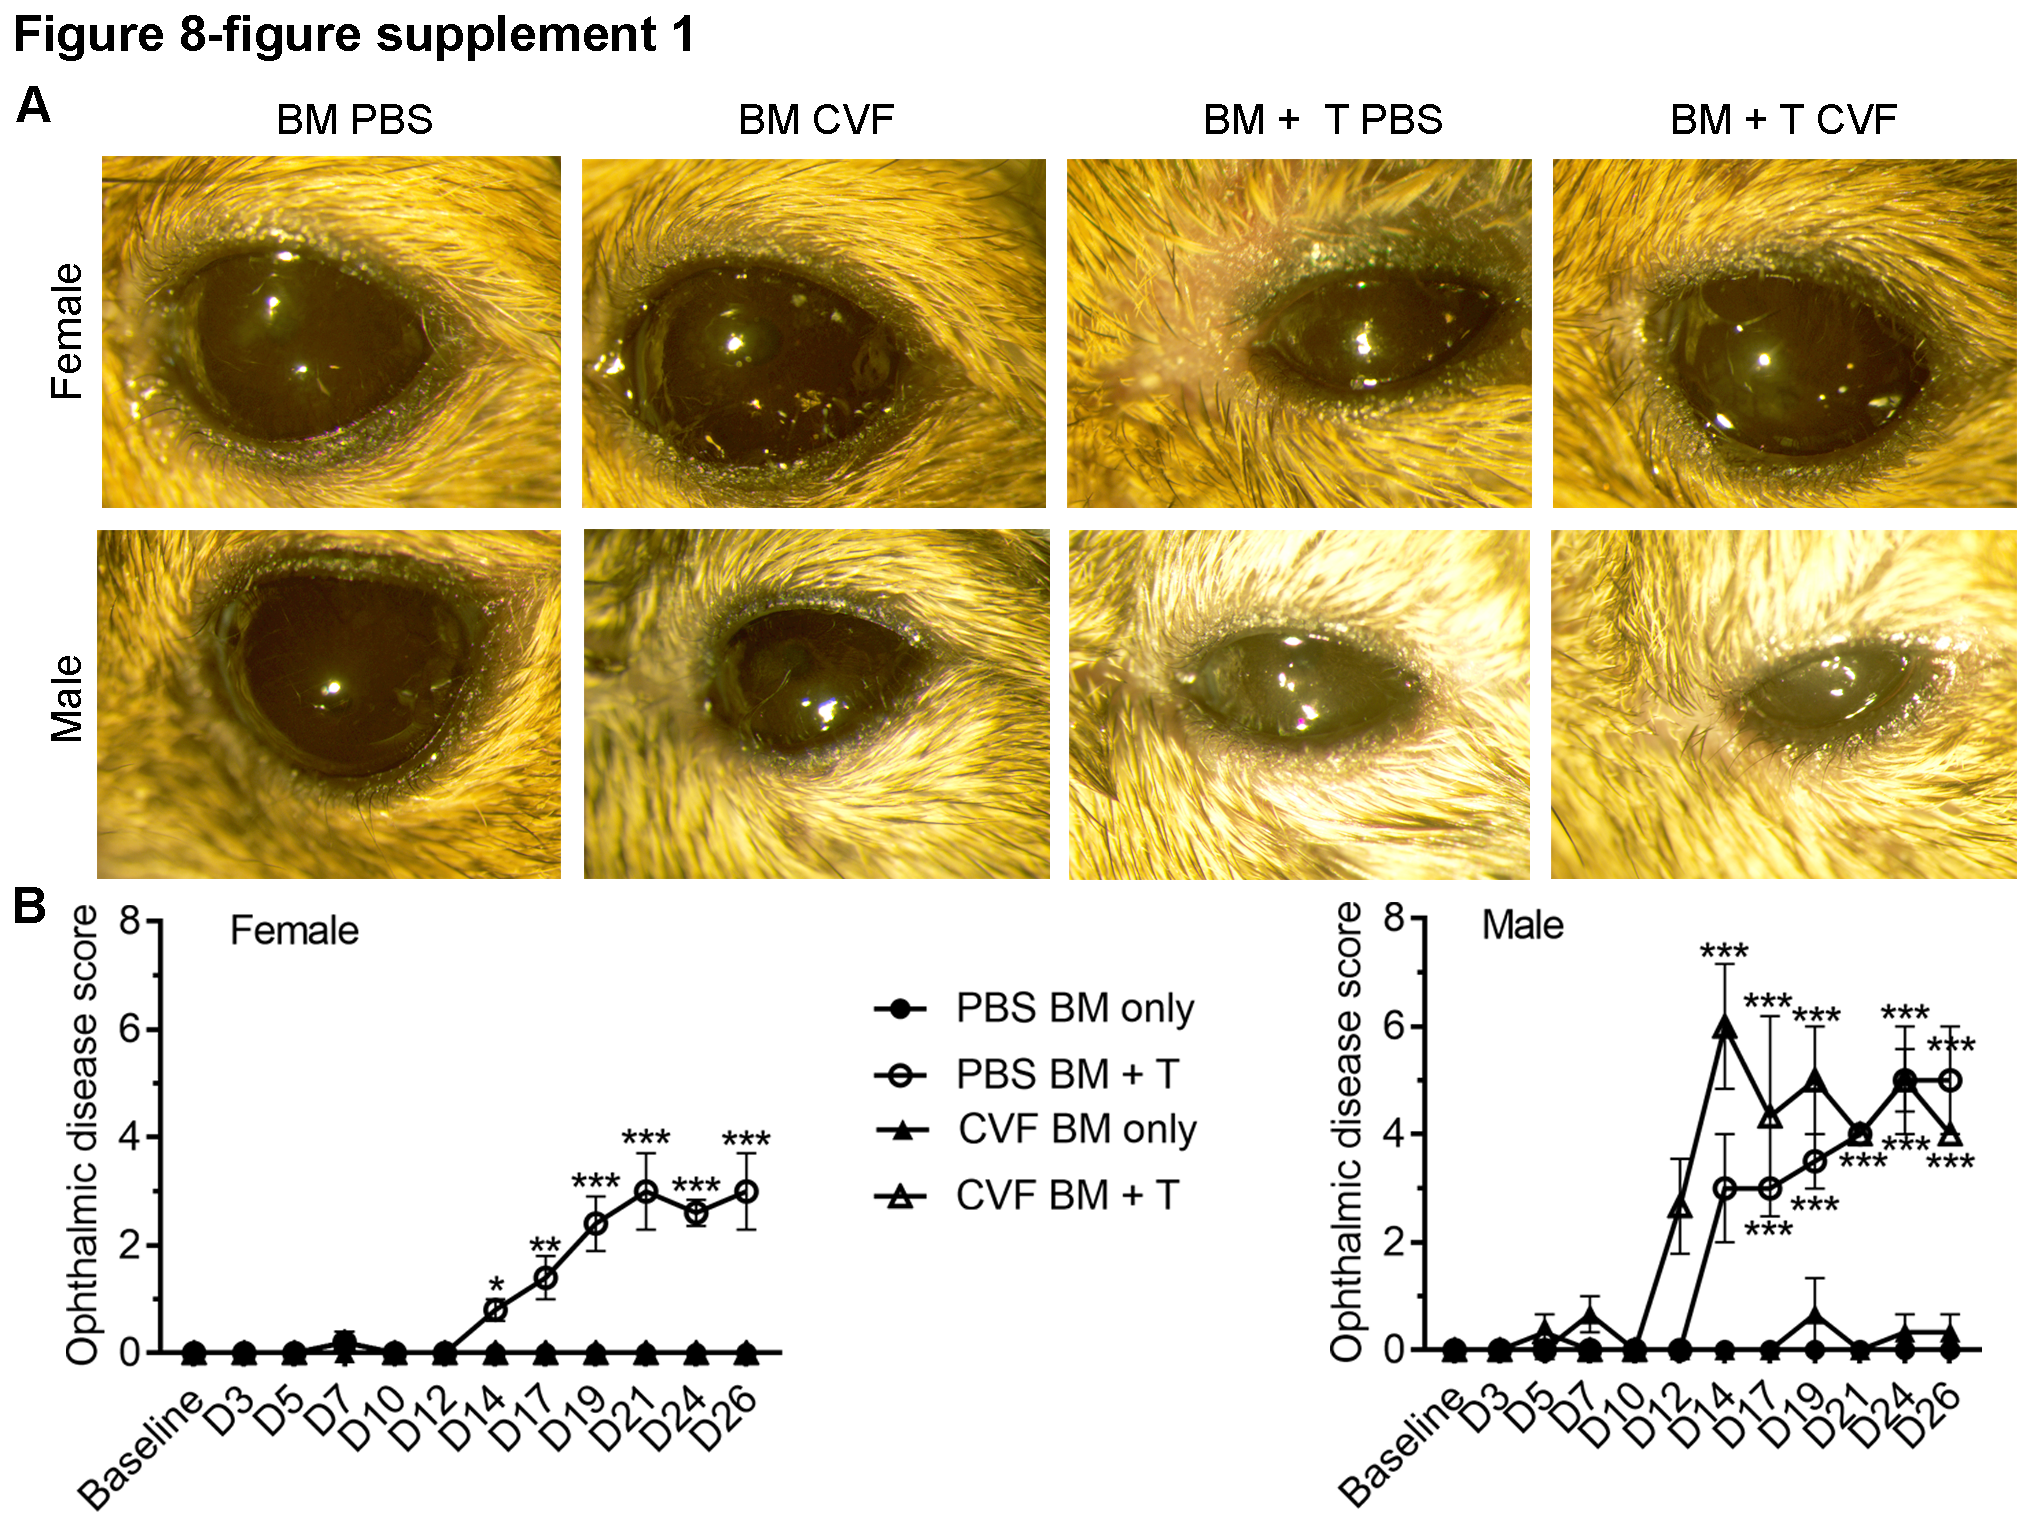

Supplement: supp [file elife-48378-supp-v1.zip › elife_poa_e48378_Figure_8_figure_supplement_1.tif]

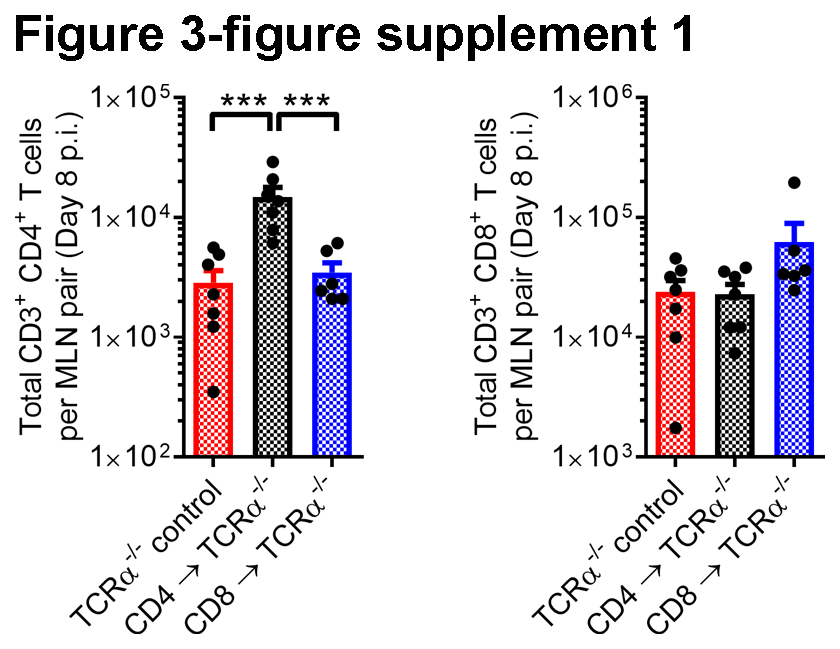

Supplement: supp [file elife-48378-supp-v1.zip › elife_poa_e48378_Figure_3_figure_supplement_1.tif]

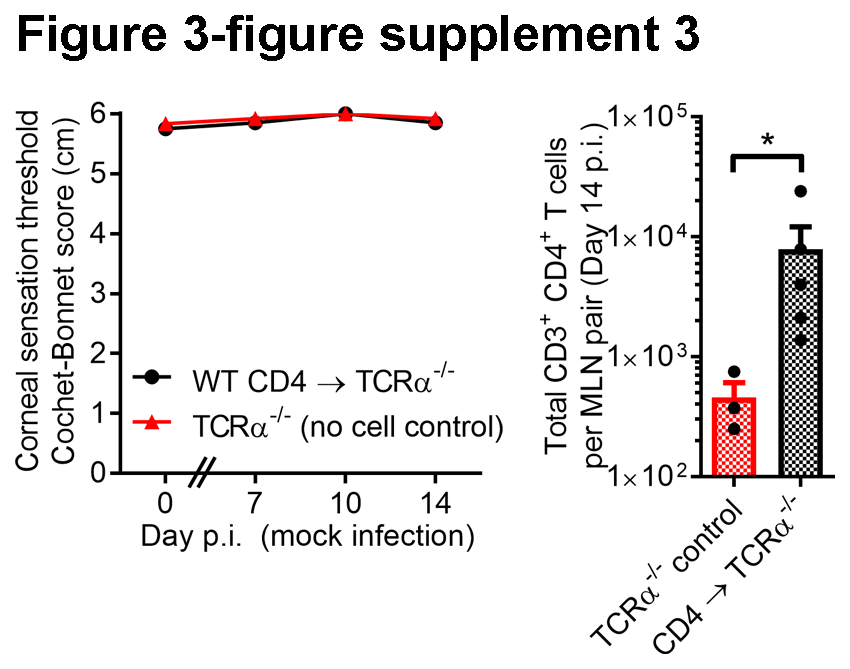

Supplement: supp [file elife-48378-supp-v1.zip › elife_poa_e48378_Figure_3_figure_supplement_3.tif]

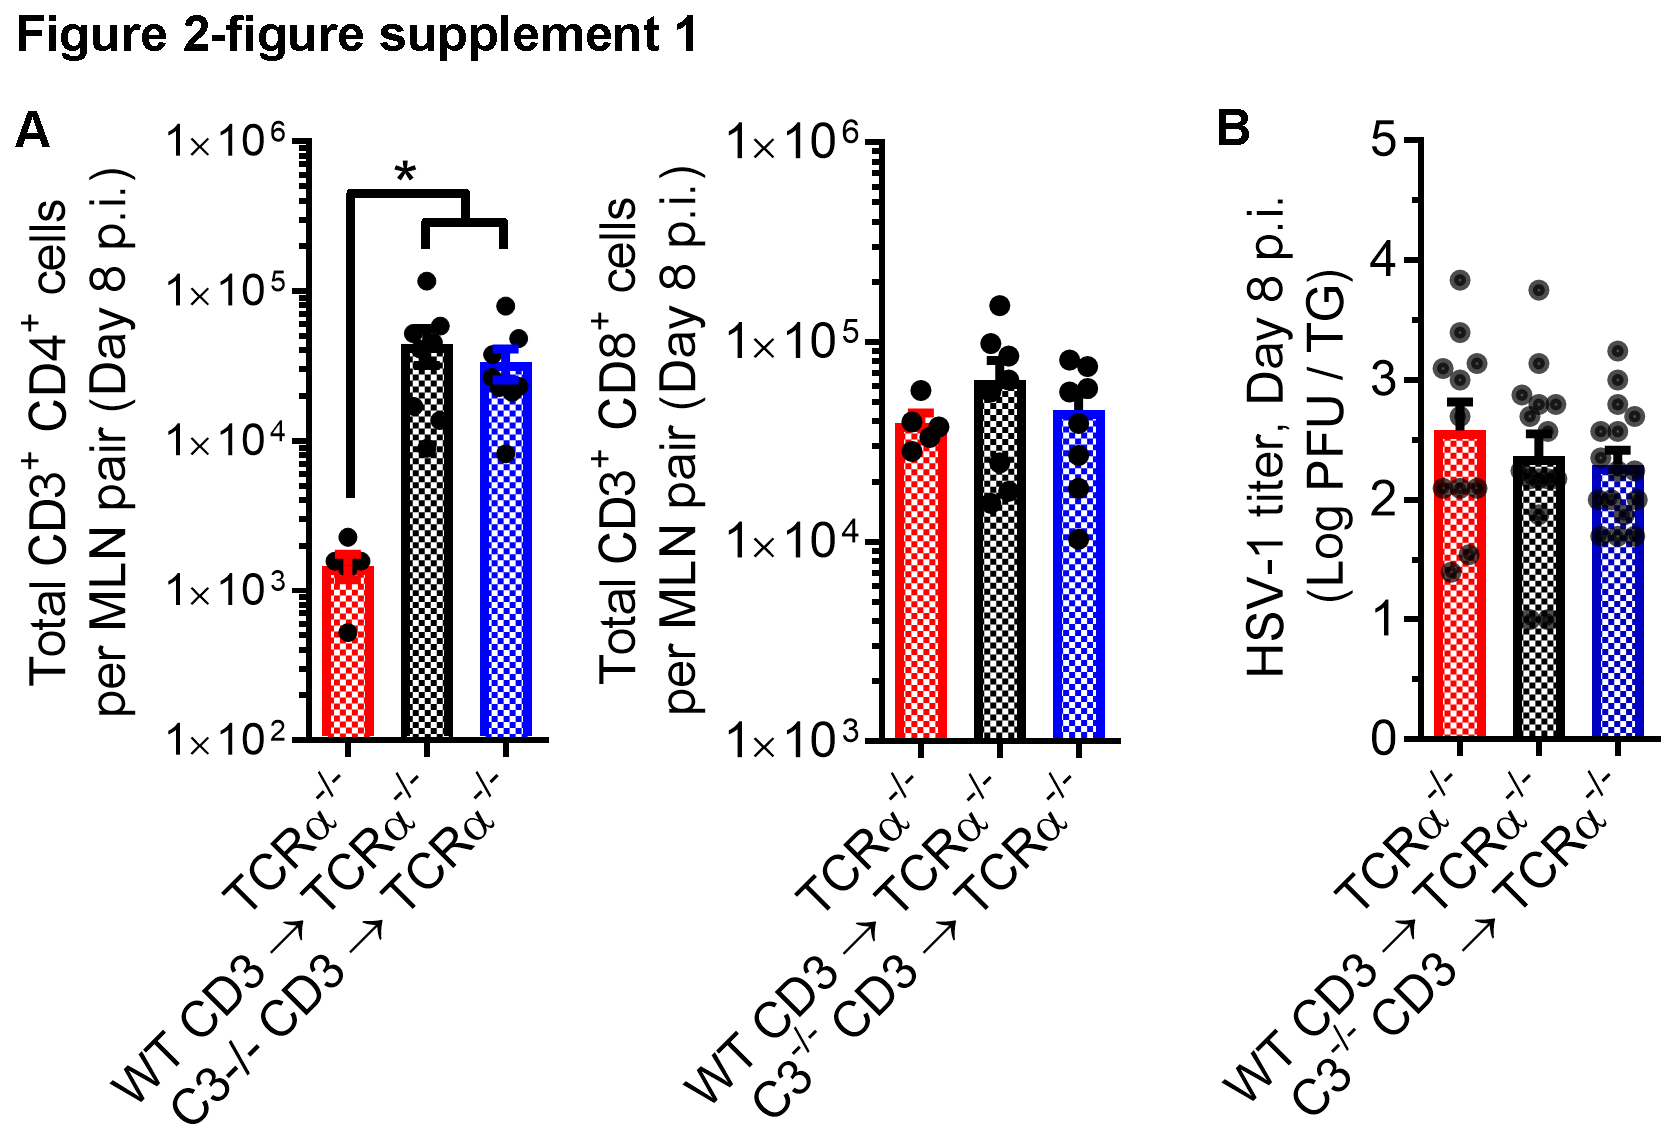

Supplement: supp [file elife-48378-supp-v1.zip › elife_poa_e48378_Figure_2_figure_supplement_1.tif]

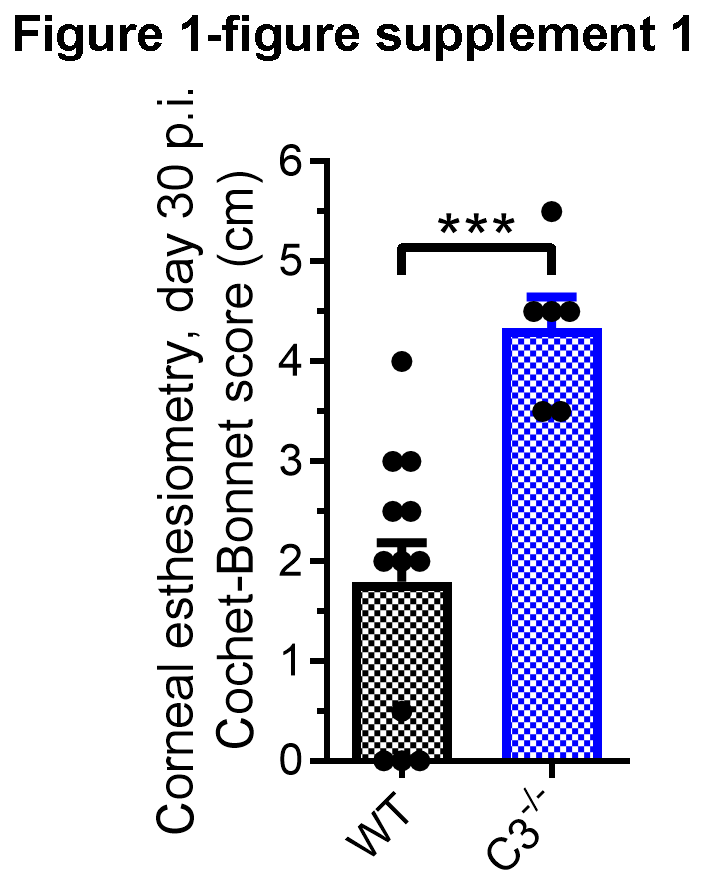

Supplement: supp [file elife-48378-supp-v1.zip › elife_poa_e48378_Figure_1_figure_supplement_1.tif]
